# Supplementary material for: Lethal Antibody Enhancement of Dengue Disease in Mice Is Prevented by Fc Modification
Source: PLOS journal article supplement (doi:10.1371/journal.ppat.1000790), 2010-02-11
Supplement: S1 (10.1371/journal.ppat.1000790.s001) [file journal.ppat.1000790.s001]

**Table S1. Effect of anti-DV1 serum and viral dose on morbidity and mortality.**

| Serum <sup>a</sup>         | DV2 dose (pfu)  | Morbidity <sup>b</sup> | Morbidity p-value vs. NMS control <sup>c</sup> | Mortality | Mean survival time $\pm$ s.d. (days) <sup>d</sup> | Mortality p-value vs. NMS control <sup>e</sup> |
|----------------------------|-----------------|------------------------|------------------------------------------------|-----------|---------------------------------------------------|------------------------------------------------|
| NMS <sup>f</sup>           | 10 <sup>7</sup> | 15/15                  |                                                | 14/15     | 4.2 $\pm$ 0.4                                     |                                                |
| NMS                        | 10 <sup>6</sup> | 6/7                    |                                                | 0/7       | n.a. <sup>g</sup>                                 |                                                |
| $\alpha$ -DV1 <sup>h</sup> | 10 <sup>6</sup> | 12/12                  | 0.5                                            | 11/12     | 3.5 $\pm$ 0.3                                     | 0.003                                          |
| NMS                        | 10 <sup>5</sup> | 0/11                   |                                                | 0/11      | n.a.                                              |                                                |
| $\alpha$ -DV1              | 10 <sup>5</sup> | 4/4                    | 0.03                                           | 4/4       | 4.0 $\pm$ 0.0                                     | 0.001                                          |
| NMS                        | 10 <sup>4</sup> | 0/4                    |                                                | 0/4       | n.a.                                              |                                                |
| $\alpha$ -DV1              | 10 <sup>4</sup> | 4/4                    | 0.03                                           | 1/4       | 5.5                                               | 0.3                                            |

<sup>a</sup>100 $\mu$ l of the indicated antiserum was given to all mice in each group.

<sup>b</sup>Mice were scored as morbid if hunched posture, ruffled fur, and lethargy were simultaneously present at any time during the first ten days post-infection.

<sup>c</sup>Result of two-sided Fisher's exact test comparing  $\alpha$ -DV1 recipients to NMS recipients at the same viral dose.

<sup>d</sup>Mean survival time of mice who succumbed to infection during 10-day timecourse.

<sup>e</sup>Result of logrank analysis comparing anti-DV1 recipients to NMS recipients at the same viral dose.

<sup>f</sup>Naive mouse serum.

<sup>g</sup>Not applicable. No mortality occurred in these groups.

<sup>h</sup>Anti-DV1 serum collected 8 weeks after infection of AG129 mice with 10<sup>5</sup> pfu DV1.
